# Supplementary material for: Simultaneous quantitation of urinary albumin and creatinine for rapid clinical albuminuria diagnostics using high-throughput paper spray mass spectrometry
Source: Royal Society of Chemistry journal article supplement (doi:10.1039/d3an01855e), 2023-12-08
Supplement: d3an01855e1.pdf [file d3an01855e1.pdf]

## ELECTRONIC SUPPLEMENTARY INFORMATION

### Simultaneous Quantitation of Urinary Albumin and Creatinine for Rapid Clinical Albuminuria Diagnostics using High- Throughput Paper Spray Mass Spectrometry

Igor Pereira<sup>1</sup>, Jason L. Robinson<sup>2</sup>, and Chris G. Gill<sup>1, 3, 4, 5</sup>

<sup>1</sup> Applied Environmental Research Laboratories (AERL), Chemistry Department, Vancouver  
Island University, Nanaimo, BC, Canada, V9R 5S5

<sup>2</sup> Health PEI, Charlottetown, PEI, Canada, C1A 7N8

<sup>3</sup> Chemistry Department, University of Victoria, Victoria, BC, Canada, V8P 5C2

<sup>4</sup> Chemistry Department, Simon Fraser University, Burnaby, BC, Canada, V5A 1S6

<sup>5</sup> Department of Occupational and Environmental Health Sciences, University of Washington,  
Seattle, WA, United States, 98195-1618

**\*Address correspondence to:**

Professor Chris G. Gill, Ph.D., P. Chem.  
Co-Director, Applied Environmental Research Laboratories (AERL)  
Department of Chemistry  
Vancouver Island University  
900 Fifth Street, Nanaimo, BC, Canada, V9R 5S5

Ph: 250-753-3245  
chris.gill@viu.ca

**Table S1** Parameters for application of rewet and spray solvents using the VeriSpray™ PS-MS ion source. Each rewetting and solvent dispense is 10  $\mu$ L

| Sample Rewetting Dispense Delay |           |
|---------------------------------|-----------|
| Dispense                        | Delay (s) |
| 1                               | 1         |
| 2                               | 1         |
| 3                               | 1         |

  

| Spray Solvent Dispense Delay |           |
|------------------------------|-----------|
| Dispense                     | Delay (s) |
| 1                            | 1         |
| 2                            | 1         |
| 3                            | 1         |
| 4                            | 3         |
| 5                            | 3         |
| 6                            | 3         |
| 7                            | 3         |
| 8                            | 3         |
| 9                            | 3         |
| 10                           | 3         |

**Table S2** Albumin concentrations (mg L<sup>-1</sup>) in 56 anonymous human patient urine samples obtained with PS-MS and a validated clinical method (immunoturbidimetry)

| <b>Sample</b> | <b>PS-MS<br/>(mg L<sup>-1</sup>)</b> | <b>Validated Clinical Method<br/>(mg L<sup>-1</sup>)</b> |
|---------------|--------------------------------------|----------------------------------------------------------|
| 1             | 0.0                                  | 5.6                                                      |
| 2             | 9.2                                  | 7.9                                                      |
| 3             | 10.3                                 | 12.9                                                     |
| 4             | 13.7                                 | 18.3                                                     |
| 5             | 21.0                                 | 24.6                                                     |
| 6             | 89.2                                 | 74.2                                                     |
| 7             | 118.1                                | 94.8                                                     |
| 8             | 197.4                                | 107.8                                                    |
| 9             | 171.0                                | 139.8                                                    |
| 10            | 191.4                                | 184.2                                                    |
| 11            | 293.2                                | 212.1                                                    |
| 12            | 821.2                                | 340.2                                                    |
| 13            | 431.0                                | 412.8                                                    |
| 14            | 462.0                                | 496.1                                                    |
| 15            | 658.5                                | 649.7                                                    |
| 16            | 984.9                                | 787.2                                                    |
| 17            | 884.6                                | 964.0                                                    |
| 18            | 872.3                                | 1003.3                                                   |
| 19            | 51.6                                 | 45.2                                                     |
| 20            | 63.5                                 | 53.3                                                     |
| 21            | 28.7                                 | 32.4                                                     |
| 22            | 12.2                                 | 16.8                                                     |
| 23            | 24.8                                 | 29.5                                                     |
| 24            | 14.0                                 | 28.1                                                     |
| 25            | 10.9                                 | 25.7                                                     |
| 26            | 8.6                                  | 18.3                                                     |
| 27            | 64.8                                 | 54.0                                                     |
| 28            | 34.7                                 | 56.0                                                     |
| 29            | 13.4                                 | 5.4                                                      |
| 30            | 66.5                                 | 100.6                                                    |
| 31            | 34.7                                 | 39.9                                                     |
| 32            | 16.5                                 | 14.1                                                     |
| 33            | 63.6                                 | 62.1                                                     |
| 34            | 624.0                                | 412.3                                                    |
| 35            | 207.3                                | 227.3                                                    |

|    |         |        |
|----|---------|--------|
| 36 | 12.2    | 5.5    |
| 37 | 390.4   | 385.2  |
| 38 | 14.0    | 11.2   |
| 39 | 115.8   | 152.7  |
| 40 | 86.7    | 99.4   |
| 41 | 68.3    | 91.5   |
| 42 | 50.3    | 84.3   |
| 43 | 21.6    | 15.1   |
| 44 | 145.7   | 189.4  |
| 45 | 433.1   | 374.0  |
| 46 | 62.7    | 69.0   |
| 47 | 27.6    | 27.2   |
| 48 | 212.0*  | 207.2  |
| 49 | 1350.4  | 1462.6 |
| 50 | 821.5   | 756.2  |
| 51 | 1026.6  | 1000.3 |
| 52 | 1452.3  | 1478.3 |
| 53 | 3580.8* | 2938.8 |
| 54 | 1052.2  | 965.6  |
| 55 | 2392.9* | 2605.6 |
| 56 | 1832.3  | 2700.6 |

---

\* Results obtained using 10-fold diluted urine samples in water.

**Table S3** Creatinine concentrations (mmol L<sup>-1</sup>) in 56 anonymous human patient urine samples obtained using PS-MS and a validated clinical method (Jaffe's method)

| Sample | PS-MS<br>(mmol L <sup>-1</sup> ) | Validated Clinical Method<br>(mmol L <sup>-1</sup> ) |
|--------|----------------------------------|------------------------------------------------------|
| 1      | 11.9                             | 10.9                                                 |
| 2      | 5.2                              | 5.0                                                  |
| 3      | 9.2                              | 8.5                                                  |
| 4      | 16.9                             | 15.5                                                 |
| 5      | 18.8                             | 18.4                                                 |
| 6      | 3.8                              | 3.1                                                  |
| 7      | 3.0                              | 3.0                                                  |
| 8      | 4.7                              | 4.2                                                  |
| 9      | 10.4                             | 9.1                                                  |
| 10     | 5.8                              | 5.4                                                  |
| 11     | 8.0                              | 7.0                                                  |
| 12     | 19.8                             | 12.4                                                 |
| 13     | 2.6                              | 2.4                                                  |
| 14     | 12.6                             | 11.7                                                 |
| 15     | 8.3                              | 8.1                                                  |
| 16     | 16.0                             | 14.0                                                 |
| 17     | 3.7                              | 3.7                                                  |
| 18     | 15.8                             | 15.1                                                 |
| 19     | 12.5                             | 11.2                                                 |
| 20     | 19.2                             | 16.9                                                 |
| 21     | 7.9                              | 7.0                                                  |
| 22     | 6.1                              | 5.7                                                  |
| 23     | 7.9                              | 7.1                                                  |
| 24     | 11.8                             | 10.3                                                 |
| 25     | 7.5                              | 6.9                                                  |
| 26     | 9.9                              | 8.6                                                  |
| 27     | 7.3                              | 6.8                                                  |
| 28     | 3.7                              | 3.0                                                  |
| 29     | 9.8                              | 7.7                                                  |
| 30     | 3.5                              | 2.9                                                  |
| 31     | 11.5                             | 10.9                                                 |
| 32     | 7.1                              | 6.0                                                  |
| 33     | 3.0                              | 2.5                                                  |
| 34     | 16.9                             | 12.9                                                 |
| 35     | 17.6                             | 14.6                                                 |

|    |       |      |
|----|-------|------|
| 36 | 5.8   | 4.5  |
| 37 | 5.0   | 3.9  |
| 38 | 12.8  | 9.9  |
| 39 | 13.3  | 11.1 |
| 40 | 9.7   | 8.0  |
| 41 | 15.4  | 12.2 |
| 42 | 6.0   | 4.8  |
| 43 | 16.4  | 12.6 |
| 44 | 9.7   | 7.9  |
| 45 | 16.9  | 12.3 |
| 46 | 8.1   | 6.7  |
| 47 | 10.7  | 8.3  |
| 48 | 39.1* | 35.0 |
| 49 | 4.5   | 3.9  |
| 50 | 8.8   | 7.0  |
| 51 | 18.1  | 14.5 |
| 52 | 7.5   | 6.6  |
| 53 | 12.4* | 9.2  |
| 54 | 7.8   | 6.3  |
| 55 | 23.5* | 20.6 |
| 56 | 11.2  | 10.0 |

---

\* Results obtained using 10-fold diluted urine samples in water.

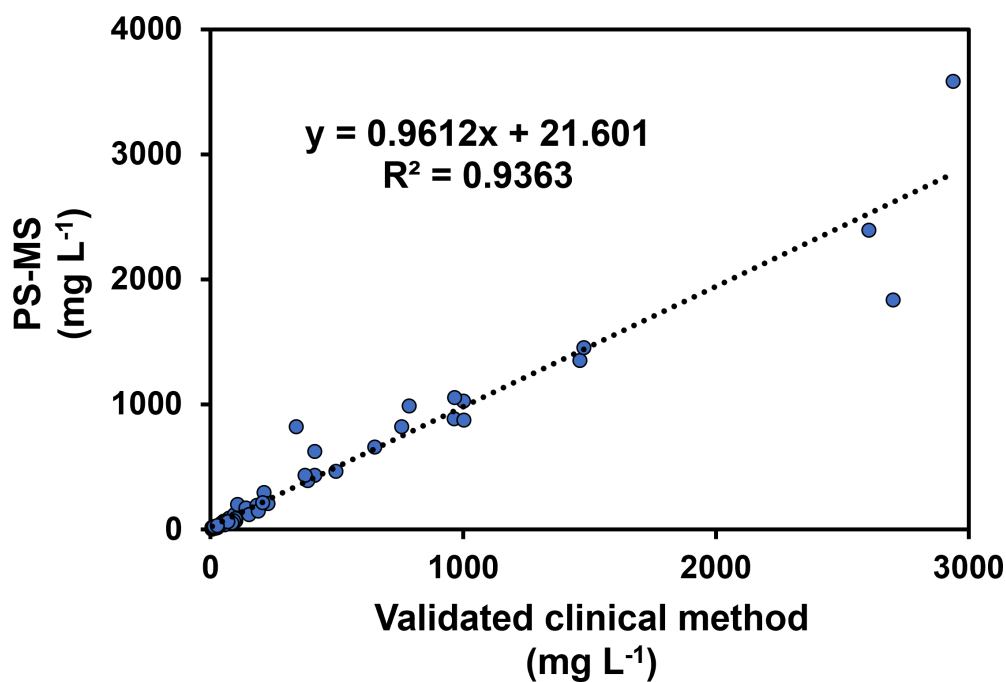

**Fig. S1** Correlation between PS-MS and a validated clinical method (immunoturbidimetry) in the analyses of albumin in 56 anonymous human patient urine samples.

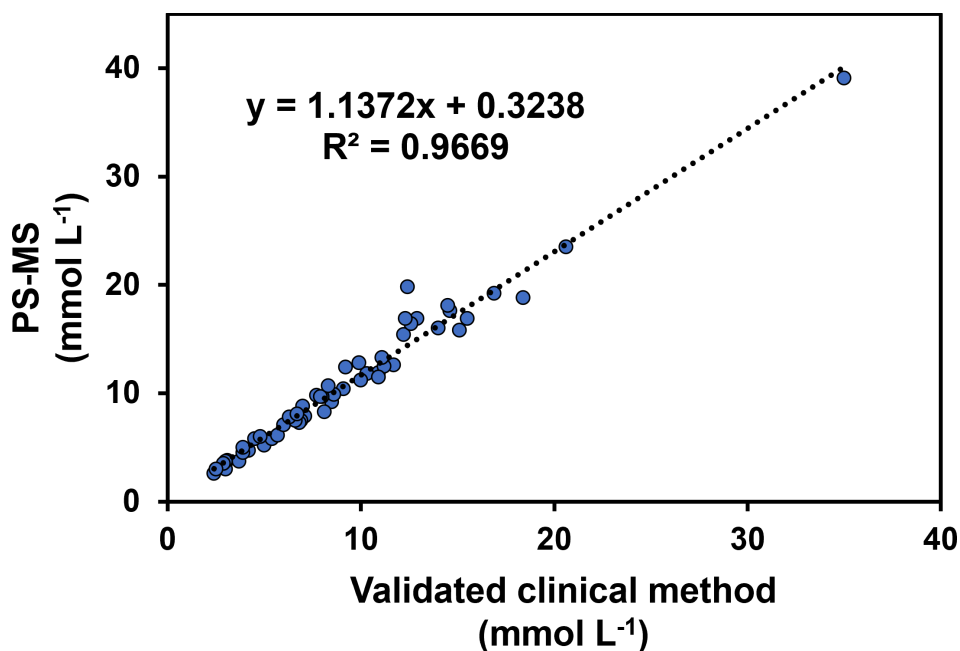

**Fig. S2** Correlation between PS-MS and a validated clinical method (Jaffe's method) in the analyses of creatinine in 56 anonymous human patient urine samples.

**Table S4** Albumin-to-creatinine ratio concentrations ( $\text{mg mmol}^{-1}$ ) in 56 anonymous human patient urine samples obtained by PS-MS and a validated clinical method. PS-MS results were obtained by simultaneously measuring albumin and creatinine. Clinical results were obtained using immunoturbidimetry for albumin and the Jaffe's method for creatinine

| Sample | PS-MS<br>Albumin/Creatinine<br>( $\text{mg mmol}^{-1}$ ) | Clinical Method<br>Albumin/Creatinine<br>( $\text{mg mmol}^{-1}$ ) |
|--------|----------------------------------------------------------|--------------------------------------------------------------------|
| 1      | 0.0                                                      | 0.5                                                                |
| 2      | 1.8                                                      | 1.6                                                                |
| 3      | 1.1                                                      | 1.5                                                                |
| 4      | 0.8                                                      | 1.2                                                                |
| 5      | 1.1                                                      | 1.3                                                                |
| 6      | 23.5                                                     | 23.9                                                               |
| 7      | 39.4                                                     | 31.6                                                               |
| 8      | 42.0                                                     | 25.7                                                               |
| 9      | 16.4                                                     | 15.4                                                               |
| 10     | 33.0                                                     | 34.1                                                               |
| 11     | 36.7                                                     | 30.3                                                               |
| 12     | 41.5                                                     | 27.4                                                               |
| 13     | 165.8                                                    | 172.0                                                              |
| 14     | 36.7                                                     | 42.4                                                               |
| 15     | 79.3                                                     | 80.2                                                               |
| 16     | 61.6                                                     | 56.2                                                               |
| 17     | 239.1                                                    | 260.5                                                              |
| 18     | 55.2                                                     | 66.4                                                               |
| 19     | 4.1                                                      | 4.0                                                                |
| 20     | 3.3                                                      | 3.2                                                                |
| 21     | 3.6                                                      | 4.6                                                                |
| 22     | 2.0                                                      | 2.9                                                                |
| 23     | 3.1                                                      | 4.2                                                                |
| 24     | 1.2                                                      | 2.7                                                                |
| 25     | 1.5                                                      | 3.7                                                                |
| 26     | 0.9                                                      | 2.1                                                                |
| 27     | 8.9                                                      | 7.9                                                                |
| 28     | 9.4                                                      | 18.7                                                               |
| 29     | 1.4                                                      | 0.7                                                                |
| 30     | 19.0                                                     | 34.7                                                               |
| 31     | 3.0                                                      | 3.7                                                                |
| 32     | 2.3                                                      | 2.4                                                                |
| 33     | 21.2                                                     | 24.8                                                               |



|    |       |       |
|----|-------|-------|
| 34 | 36.9  | 32.0  |
| 35 | 11.8  | 15.6  |
| 36 | 2.1   | 1.2   |
| 37 | 78.1  | 98.8  |
| 38 | 1.1   | 1.1   |
| 39 | 8.7   | 13.8  |
| 40 | 8.9   | 12.4  |
| 41 | 4.4   | 7.5   |
| 42 | 8.4   | 17.6  |
| 43 | 1.3   | 1.2   |
| 44 | 15.0  | 24.0  |
| 45 | 25.6  | 30.4  |
| 46 | 7.7   | 10.3  |
| 47 | 2.6   | 3.3   |
| 48 | 5.4   | 5.9   |
| 49 | 300.1 | 375.0 |
| 50 | 93.4  | 108.0 |
| 51 | 56.7  | 69.0  |
| 52 | 193.6 | 224.0 |
| 53 | 288.8 | 319.4 |
| 54 | 134.9 | 153.3 |
| 55 | 101.8 | 126.5 |
| 56 | 163.6 | 270.1 |

---

**Table S5** Albumin-to-creatinine concentrations (mg mmol<sup>-1</sup>) and clinical outcomes for 6 outlier samples in the comparison between PS-MS and clinical method. The albuminuria classification is based on the KDIGO<sup>S1</sup> (Kidney Disease: Improving Global Outcomes) criteria

| Sample | PS-MS<br>Concentration (mg mmol <sup>-1</sup> )<br>and clinical outcome | Clinical Method<br>Concentration (mg mmol <sup>-1</sup> ) and<br>clinical outcome |
|--------|-------------------------------------------------------------------------|-----------------------------------------------------------------------------------|
| 8      | 42.0 (macroalbuminuria)                                                 | 25.7 (microalbuminuria)                                                           |
| 12     | 41.5 (macroalbuminuria)                                                 | 27.4 (microalbuminuria)                                                           |
| 25     | 1.5 (normoalbuminuria)                                                  | 3.7 (microalbuminuria)                                                            |
| 30     | 19.0 (microalbuminuria)                                                 | 34.7 (macroalbuminuria)                                                           |
| 45     | 25.6 (microalbuminuria)                                                 | 30.4 (macroalbuminuria)                                                           |
| 47     | 2.6 (normoalbuminuria)                                                  | 3.3 (microalbuminuria)                                                            |

**Table S6** Sensitivity, specificity, and bias obtained from the PS-MS clinical outcomes in comparison with clinical decision limits established by the Canadian Diabetes Association (CDA)<sup>S2</sup>

|                      | Clinical<br>decision limits<br>(mg mmol <sup>-1</sup> ) | PS-MS<br>sensitivity (%) | PS-MS<br>specificity (%) | PS-MS<br>bias (%) |
|----------------------|---------------------------------------------------------|--------------------------|--------------------------|-------------------|
| Normoalbuminuria     | <2                                                      | 89                       | 94                       | -0.04             |
| Microalbuminuria     | 2-20                                                    | 94                       | 89                       | -2.0              |
| Overt<br>nephropathy | >20                                                     | 92                       | 100                      | -13.7             |

## References

S1 KDIGO, *Kidney Int.*, 2022, **102**, 1–127.

S2 P. McFarlane, D. Cherney, R. E. Gilbert and P. Senior, *Can. J. Diabetes*, 2018, **42**, 201–209.
